# Supplementary material for: Should I stay or should I go? Initiation of joint travel in mother–infant dyads of two chimpanzee communities in the wild
Source: PubMed Central journal article supplement (PMC4824811; doi:10.1007/s10071-015-0948-z), 2016-02-01
Supplement: 10071_2015_948_MOESM1_ESM.pdf [file 10071_2015_948_MOESM1_ESM.pdf]

## **Online Resource 1: Additional Tables and Figures**

Journal: Animal Cognition

Title: 'Should I stay or should I go?' – Initiation of joint travel in mother-infant dyads of two chimpanzee communities in the wild

Authors: Marlen Fröhlich\*, Roman M. Wittig, Simone Pika

Affiliation of corresponding author\*: Max Planck Institute for Ornithology, Humboldt Research Group 'Comparative Gestural Signalling',

Eberhard-Gwinner-Strasse 9, 82319 Seewiesen, Germany

Affiliation of corresponding author\*: [mfroehlich@orn.mpg.de](mailto:mfroehlich@orn.mpg.de)

**Table S1** Action types produced to initiate carries in chimpanzee mother-infant dyads identified in this study and corresponding behavioural patterns of the Mahale chimpanzees [46]

| Action             | Definition (this study)                                    | Used by | Mahale                   |
|--------------------|------------------------------------------------------------|---------|--------------------------|
| <b>Tactile</b>     |                                                            |         |                          |
| Grab [grb]         | Individual grasps or tugs on limbs of another              | Both    | Grab                     |
| Hold on [hon]      | Individual clings with one or both hands to fur of another | Infant  | Grasp and push shoulders |
| Lift on back [lob] | Individual lifts infant on own back                        | Mother  | Put dorsal               |
| <b>Visual</b>      |                                                            |         |                          |
| Approach [apr]     | Individual moves towards another                           | Both    | Approach                 |
| Freeze [apr]       | Individual pauses movement for > 2 seconds                 | Both    | Wait for companion       |
| Move away          | Individual moves away from another                         | Both    | Depart                   |

**Table S2** Infant scan data recorded in 15-minute intervals to complement video recordings

| <b>Recorded parameter</b>                      | <b>Levels</b>                                                                                                                       |
|------------------------------------------------|-------------------------------------------------------------------------------------------------------------------------------------|
| 1. General                                     | infant ID, date & time, visibility                                                                                                  |
| 2. Body posture                                | cling ventral, cling dorsal, cling side, ride, sit, lie (on conspecific), climb, hang, walk, stand bipedal/quadrupedal, run         |
| 3. Activity                                    | breast-feed, feed, rest, play, groom, being groomed, self-groom, exploration, being carried, follow mother, explore, observe others |
| 4. Play type (if applicable)                   | solitary play, object play (solitary), object play (social), rough play, soft play                                                  |
| 5. Object involved type (if applicable)        | leaf, stone, stick, bark, fruit(s), plant material, termite mould, liane, water, wood, other                                        |
| 6. Context                                     | feed, rest, play, groom, travel, aggression, patrol, inter-group encounter                                                          |
| 7. Interaction partner(s)                      | ID and relationship of/to conspecific(s)                                                                                            |
| 8. Physical distance between mother and infant | body contact, within arm's reach, 2 arm lengths, 1-2 m, 2-5 m, 5-10 m and >10 m.                                                    |
| 9. Attentional state of mother                 | in visual field, 90°, 180°                                                                                                          |
| 10. Group composition                          | mixed group, only adult females, family (mother and dependent offspring)                                                            |
| 11. Height & Vegetation                        | ground, low-storey, mid-storey, canopy<br>open, moderate, dense                                                                     |

**Table S3** Dice coefficients ( $D_j$ ) measuring the similarity between the gestural repertoires of individual mothers of the same or different chimpanzee group. Initials in *italics* and plain font represent the IDs of mothers from the Tai and Kanyawara groups, respectively.

|           | <i>IS</i> | <i>KS</i> | <i>MB</i> | <i>SM</i> | LN   | ML   | OT   | TG   | WA   | WL   |
|-----------|-----------|-----------|-----------|-----------|------|------|------|------|------|------|
| <i>IS</i> | 1.00      |           |           |           |      |      |      |      |      |      |
| <i>KS</i> | 0.73      | 1.00      |           |           |      |      |      |      |      |      |
| <i>MB</i> | 0.79      | 0.69      | 1.00      |           |      |      |      |      |      |      |
| <i>SM</i> | 0.70      | 0.67      | 0.67      | 1.00      |      |      |      |      |      |      |
| LN        | 0.56      | 0.63      | 0.55      | 0.43      | 1.00 |      |      |      |      |      |
| ML        | 0.70      | 0.67      | 0.67      | 0.63      | 0.71 | 1.00 |      |      |      |      |
| OT        | 0.80      | 0.70      | 0.76      | 0.67      | 0.63 | 0.76 | 1.00 |      |      |      |
| TG        | 0.74      | 0.80      | 0.77      | 0.70      | 0.57 | 0.61 | 0.79 | 1.00 |      |      |
| WA        | 0.83      | 0.82      | 0.86      | 0.80      | 0.67 | 0.70 | 0.80 | 0.89 | 1.00 |      |
| WL        | 0.70      | 0.76      | 0.81      | 0.63      | 0.75 | 0.53 | 0.67 | 0.77 | 0.87 | 1.00 |

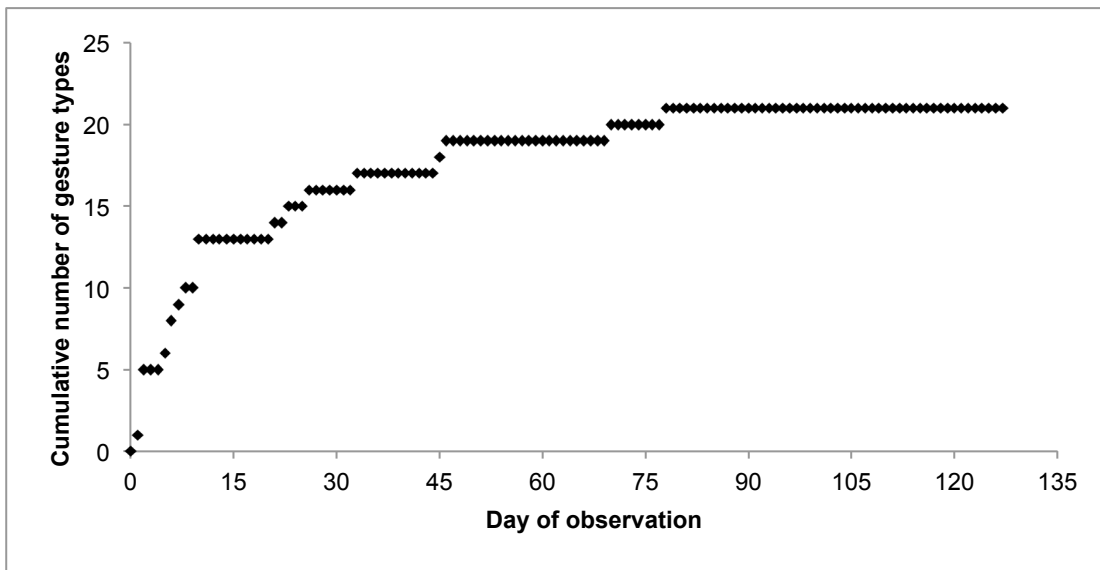

**Figure S1** Cumulative gestural repertoire used in joint travel interactions plotted against observation time (days).
