# Supplementary material for: Should I stay or should I go? Initiation of joint travel in mother–infant dyads of two chimpanzee communities in the wild
Source: PubMed Central journal article supplement (PMC4824811; doi:10.1007/s10071-015-0948-z), 2016-02-01
Supplement: 10071_2015_948_MOESM2_ESM.pdf [file 10071_2015_948_MOESM2_ESM.pdf]

## **Online Resource 2: Model stabilities**

Journal: Animal Cognition

Title: 'Should I stay or should I go?' – Initiation of joint travel in mother-infant dyads of two chimpanzee communities in the wild

Authors: Marlen Fröhlich\*, Roman M. Wittig, Simone Pika

Affiliation of corresponding author\*: Max Planck Institute for Ornithology,  
Humboldt Research Group 'Comparative Gestural Signalling', Eberhard-Gwinner-  
Strasse 9, 82319 Seewiesen, Germany

Affiliation of corresponding author\*: [mfroehlich@orn.mpg.de](mailto:mfroehlich@orn.mpg.de)

| <b>Action</b>         | orig   | min    | max    |
|-----------------------|--------|--------|--------|
| (Intercept)           | -0.799 | -1.129 | -0.624 |
| rolemo                | 0.202  | -0.001 | 0.459  |
| z.inf_age             | -0.171 | -0.275 | -0.004 |
| z.mean.inf.age        | -0.961 | -1.303 | -0.698 |
| urgency               | 0.014  | -0.034 | 0.047  |
| inf_sexM              | 0.032  | -0.131 | 0.195  |
| group.L               | -0.089 | -0.16  | -0.005 |
| group.Q               | -0.009 | -0.04  | 0.041  |
| z.mot_exp             | 0.015  | -0.108 | 0.077  |
| siteT                 | 0.389  | 0.163  | 0.658  |
| rolemo:z.inf_age      | 0.192  | -0.022 | 0.363  |
| rolemo:z.mean.inf.age | 0.737  | 0.528  | 1.063  |
| infant@role.code      | 0      | 0      | 0      |
| infant.1@z.inf_age    | 0      | 0      | 0      |
| infant.2@urgency      | 0      | 0      | 0      |
| infant.3@int.r.ia     | 0.203  | 0.117  | 0.23   |
| infant.4@(Intercept)  | 0      | 0      | 0.04   |
| mother@(Intercept)    | 0.213  | 0.04   | 0.232  |

| <b>Tactile gesture</b> | orig   | min    | max    |
|------------------------|--------|--------|--------|
| (Intercept)            | -1.455 | -1.808 | -0.897 |
| rolemo                 | 0.298  | 0.023  | 0.664  |
| z.inf_age              | -0.546 | -0.685 | -0.423 |
| z.mean.inf.age         | 0.329  | 0.201  | 0.438  |
| urgency                | -0.797 | -0.875 | -0.735 |
| inf_sexM               | -0.038 | -0.243 | 0.123  |
| group.L                | 0.136  | 0.006  | 0.24   |
| group.Q                | -0.221 | -0.286 | -0.082 |
| z.mot_exp              | -0.023 | -0.135 | 0.132  |
| siteT                  | -0.644 | -0.901 | -0.418 |
| rolemo:z.inf_age       | 0.448  | 0.287  | 0.606  |
| rolemo:z.mean.inf.age  | -0.332 | -0.455 | -0.206 |
| infant@role.code       | 0.233  | 0      | 0.281  |
| infant.1@z.inf_age     | 0      | 0      | 0      |
| infant.2@urgency       | 0      | 0      | 0      |
| infant.3@int.r.ia      | 0.048  | 0      | 0.161  |
| infant.4@(Intercept)   | 0      | 0      | 0      |
| mother@(Intercept)     | 0      | 0      | 0.069  |

| <b>Visual gesture</b> | orig   | min    | max    |
|-----------------------|--------|--------|--------|
| (Intercept)           | -3.047 | -3.498 | -2.941 |
| rolemo                | 2.272  | 2.12   | 2.549  |
| z.inf_age             | 0.067  | -0.302 | 0.409  |
| z.mean.inf.age        | -0.035 | -0.78  | 0.103  |
| urgency               | 0.481  | 0.416  | 0.549  |
| inf_sexM              | -0.109 | -0.283 | 0.111  |
| group.L               | 0.107  | 0.047  | 0.198  |
| group.Q               | 0.124  | 0.066  | 0.177  |
| z.mot_exp             | 0.1    | 0.03   | 0.254  |
| siteT                 | 0.039  | -0.279 | 0.274  |
| rolemo:z.inf_age      | -0.075 | -0.353 | 0.282  |
| rolemo:z.mean.inf.age | 0.22   | 0.121  | 0.807  |
| infant@role.code      | 0.156  | 0      | 0.178  |
| infant.1@z.inf_age    | 0.223  | 0      | 0.247  |
| infant.2@urgency      | 0      | 0      | 0.101  |
| infant.3@int.r.ia     | 0      | 0      | 0.204  |
| infant.4@(Intercept)  | 0      | 0      | 0      |
| mother@(Intercept)    | 0      | 0      | 0      |

| <b>Initiator</b>   | orig   | min    | max    |
|--------------------|--------|--------|--------|
| (Intercept)        | -1.804 | -2.282 | -1.074 |
| z.inf_age          | 0.546  | 0.422  | 0.676  |
| z.mean.inf.age     | 0.792  | 0.639  | 1.214  |
| urgency            | 0.022  | -0.136 | 0.194  |
| inf_sexM           | 0.053  | -0.324 | 0.302  |
| groupfemales       | 0.803  | 0.539  | 1.18   |
| groupmixed         | 0.637  | 0.347  | 0.96   |
| z.mot_exp          | 0.688  | 0.534  | 0.928  |
| siteT              | 0.351  | -0.088 | 0.605  |
| dyad@z.inf_age     | 0.613  | 0.333  | 0.718  |
| dyad.1@urgency     | 0      | 0      | 0      |
| dyad.2@(Intercept) | 0      | 0      | 0.151  |
